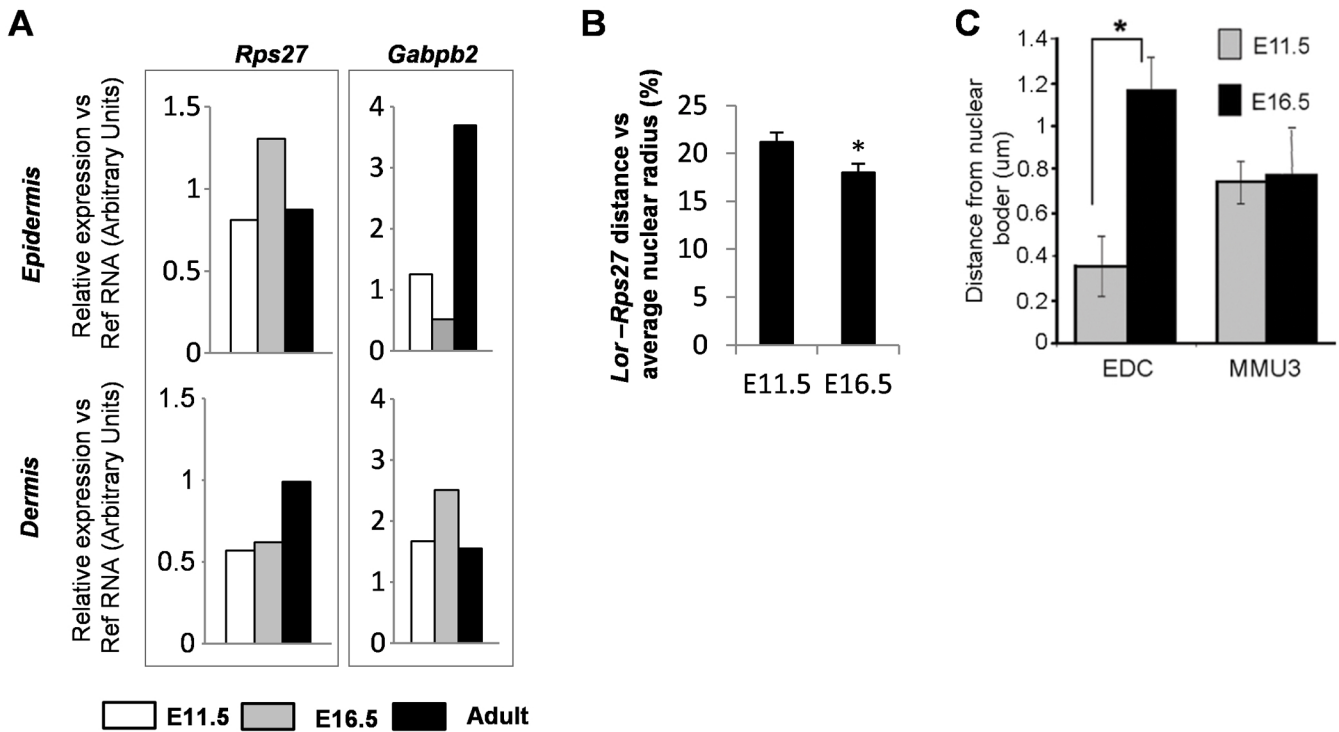

FigS1. Mardaryev et al.

**Figure S1. Dynamics of *Rps27* and *Gabpb2* gene expression during epidermal and dermal development. Changes in distances between *Rps27* and *Lor* and between nuclear border and EDC or MMU3 in the developing epidermis.**

(A) Microarray analysis of RNA from laser-captured epidermis and dermis of mice at distinct stages of expression. Means are shown for relative transcription activity normalized to the reference RNA levels for the indicated genes. Three samples were used for each stage. (B) Distances between *Lor* and *Rps27* in basal epidermal keratinocytes normalized to the average nuclear radius at E11.5 and E16.5. Mean+S.E.M, n=60. Pair-wise comparisons – differences between the E11.5 versus E16.5 are significant ( $p < 0.01$ , Newman-Keuls test after one way ANOVA test) (C) Distances between the EDC or centre of MMU3 and nuclear border in basal epidermal keratinocytes of WT mice (E11.5, E16.5). Mean+S.E.M, n=60, difference in the distances for EDC is significant ( $p < 0.001$ , two-tailed t-test).

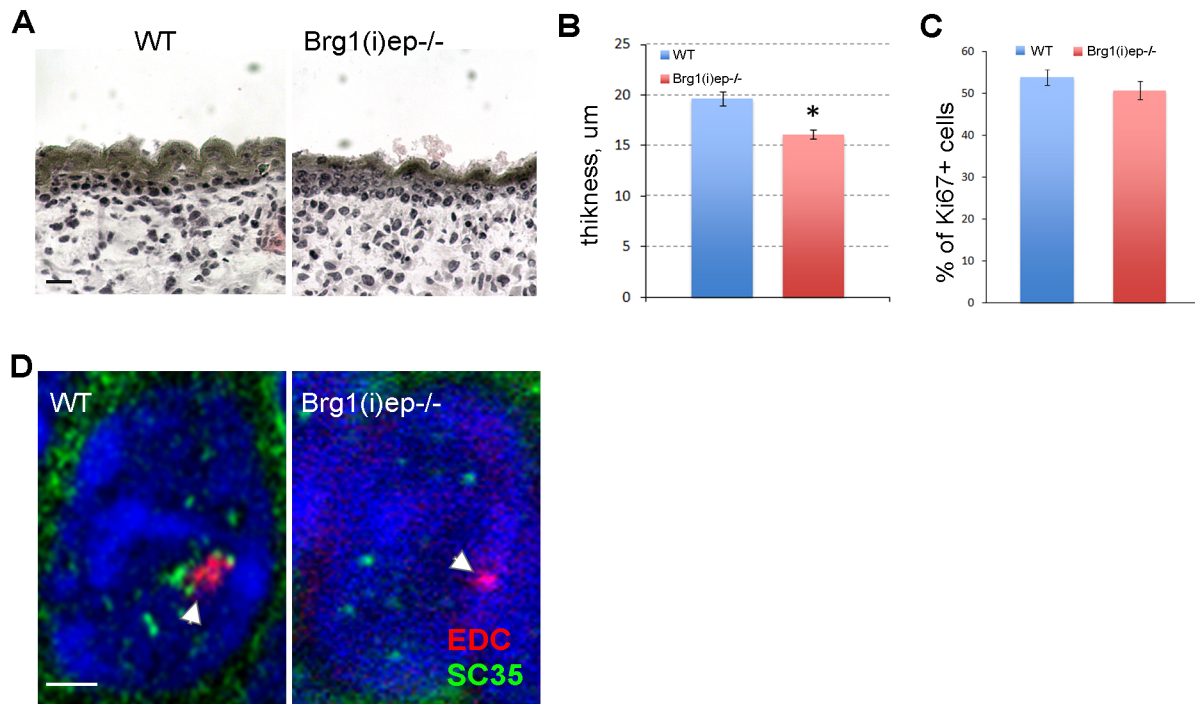

Fig S2. Mardaryev et al

**Figure S2. Morphological analysis of the epidermis in Brg1(i)ep<sup>-/-</sup> and control mice at E16.5.**

(A) Hematoxylin staining of the Brg1(i)ep<sup>-/-</sup> and control mouse skin at E16.5. (B) Epidermis of the Brg1(i)ep<sup>-/-</sup> mice is significantly thinner than the controls at E16.5 (Mean+S.E.M.,  $p < 0.01$ , two-tailed t-test). (C) No difference in the percentage of the Ki-67 positive cells between the epidermis of Brg1(i)ep<sup>-/-</sup> and control mice at E16.5. (D) Multi-color 3D-FISH with BACs containing the EDC combined with immunostaining for SC-35 in the epidermis of control and Brg1(i)ep<sup>-/-</sup> mice. Positions of the EDC in epidermal cell nuclei are shown by arrowheads in representative single Z-sections. Scale bar is 2  $\mu\text{m}$ .

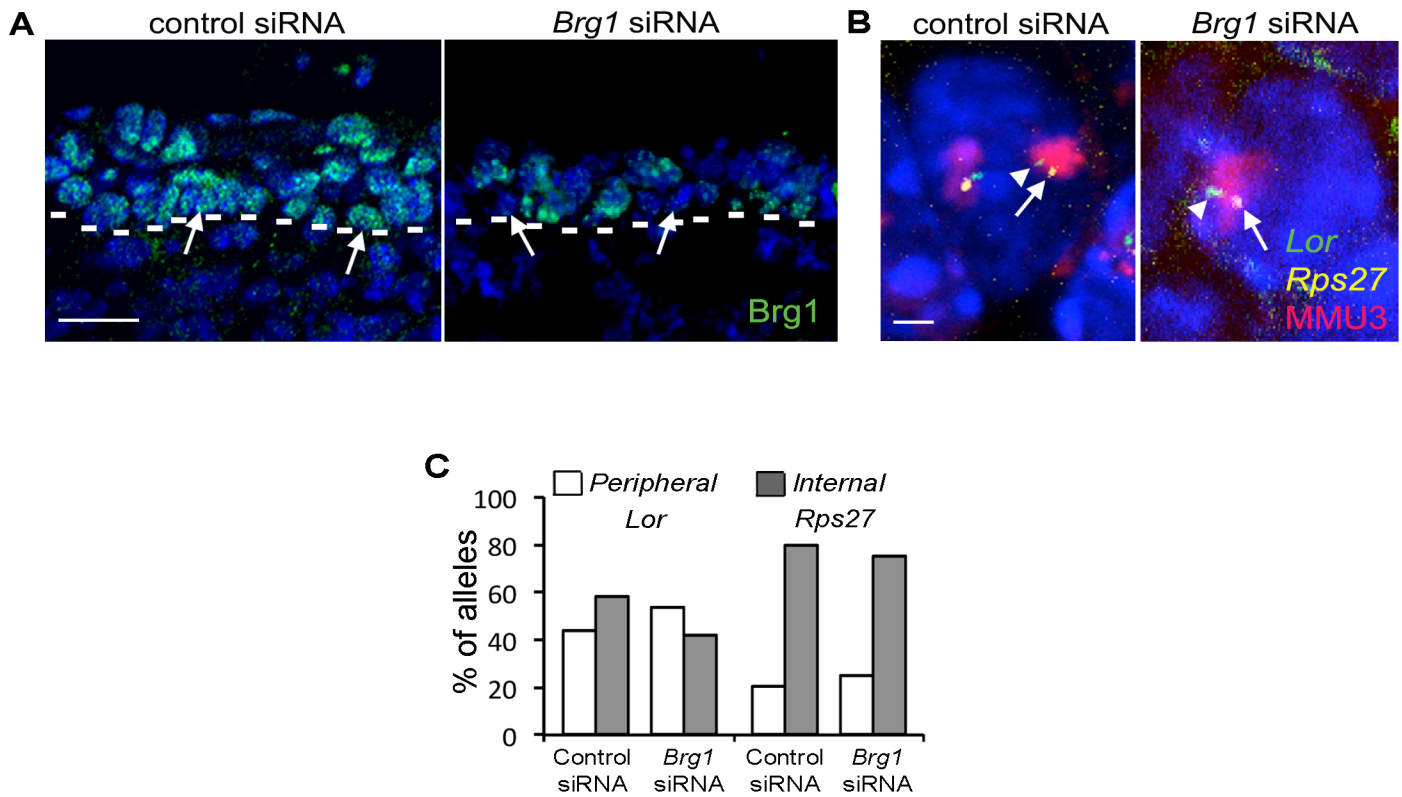

FigS3. Mardaryev et al.

**Figure S3. Brg1 is involved in the relocation of Lor gene within MMU3 in developing epidermis.** (A) Reduction in the expression of Brg1 protein in the epidermis of E12.5 embryos treated with Brg1 siRNA for two days ex vivo in comparison with embryos treated with control siRNA. Notice the appearance of Brg1 negative cells in the epidermis of Brg1 siRNA treated embryos that are absent in the control epidermis (arrows) and reduction in protein expression level in the majority of the epidermal cells after Brg1 siRNA treatment. Scale bar is 25  $\mu$ m. (B) Multi-color 3D-FISH with BACs containing the Lor and Rps27 together with the whole mouse chromosome territory 3 (MMU3) paint in the epidermal cells of the E12.5 embryos treated ex vivo with Brg1 or control siRNA. Localization of Lor (shown by arrows) and localization of Rps27 (shown by arrowheads) in distinct regions within the MMU3 (p-peripheral versus i – internal) are shown in representative single Z-sections. Scale bar is 2  $\mu$ m. (C) Results of image analysis after Multi-color 3D-FISH with BACs containing the Lor and Rps27, and mouse chromosome territory 3 (MMU3). Frequencies of intra-MMU3 distribution (peripheral versus the internal parts of the MMU3) of Lor and Rps27 in basal epidermal cells in E12.5 embryos treated with Brg1 or control siRNA. For Brg1 siRNA n=88, for control siRNA n=110. P-values calculated for pair-wise comparison are: Lor (p=0.035), Rps27 (p=0.45), Chi-square test.



|          |          | isoform                                                                   |               |      |       |       |        |      |      |      |      |
|----------|----------|---------------------------------------------------------------------------|---------------|------|-------|-------|--------|------|------|------|------|
| 90530874 | 90544432 | Peptidoglycan recognition protein 4                                       | Pglyrp4       | N.D. | N.D.  | N.D.  | N.D.   | N.D. | N.D. | N.D. | N.D. |
| 90562587 | 90565233 | apoptosis inhibitor 5 pseudogene                                          | LOC329706     | N.D. | N.D.  | N.D.  | N.D.   | N.D. | N.D. | N.D. | N.D. |
| 90579741 | 90581802 | predicted gene, EG545541                                                  | EG545541      | N.D. | N.D.  | N.D.  | N.D.   | N.D. | N.D. | N.D. | N.D. |
| 90682671 | 90692628 | similar to Calgranulin B (Migration inhibitory factor-related protein 14) | LOC635737     | N.D. | N.D.  | N.D.  | N.D.   | N.D. | N.D. | N.D. | N.D. |
| 90718795 | 90720856 | predicted gene, EG668174                                                  | EG668174      | N.D. | N.D.  | N.D.  | N.D.   | N.D. | N.D. | N.D. | N.D. |
| 90813317 | 90821107 | similar to nischarin                                                      | LOC668179     | N.D. | N.D.  | N.D.  | N.D.   | N.D. | N.D. | N.D. | N.D. |
| 90841248 | 90844152 | similar to 60S acidic ribosomal protein P1                                | LOC635756     | N.D. | N.D.  | N.D.  | N.D.   | N.D. | N.D. | N.D. | N.D. |
| 90875369 | 90880395 | RIKEN cDNA 4930529C04 gene                                                | 4930529C04Rik | N.D. | N.D.  | N.D.  | N.D.   | N.D. | N.D. | N.D. | N.D. |
| 90892059 | 90894727 | RIKEN cDNA 9130204L05 gene                                                | 9130204L05Rik | N.D. | N.D.  | N.D.  | N.D.   | N.D. | N.D. | N.D. | N.D. |
| 91542275 | 91544416 | similar to S100 calcium-binding protein; S100RVP                          | LOC100042463  | N.D. | N.D.  | N.D.  | N.D.   | N.D. | N.D. | N.D. | N.D. |
| 91818534 | 91835506 | Peptidoglycan recognition protein 3                                       | Pglyrp3       | N.D. | N.D.  | N.D.  | N.D.   | N.D. | N.D. | N.D. | N.D. |
| 91828410 | 91828989 | predicted gene, EG619750                                                  | EG619750      | N.D. | N.D.  | N.D.  | N.D.   | N.D. | N.D. | N.D. | N.D. |
| 91884193 | 91887064 | Loricrin                                                                  | Lor           | 1.71 | 34.11 | 32.76 | 102.86 | 1.24 | 2.20 | 1.41 |      |
| 91926126 | 91927869 | proline rich 9                                                            | Prr9          | 0.67 | 3.24  | 0.45  | 1.14   | 0.77 | 1.58 | 0.95 |      |
| 92019757 | 92026413 | small proline-rich protein 2A1                                            | Sprr2a1       | N.D. | N.D.  | N.D.  | N.D.   | N.D. | N.D. | N.D. | N.D. |
| 92054569 | 92061226 | small proline-rich protein 2A2                                            | Sprr2a2       | N.D. | N.D.  | N.D.  | N.D.   | N.D. | N.D. | N.D. | N.D. |
| 92120627 | 92122007 | small proline-rich protein                                                | Sprr2b        | 0.47 | 0.45  | 0.50  | 0.77   | 0.42 | 0.37 | 0.49 |      |

|          |          |                                                 |              |      |      |      |       |      |      |      |
|----------|----------|-------------------------------------------------|--------------|------|------|------|-------|------|------|------|
|          |          | 2B                                              |              |      |      |      |       |      |      |      |
| 92130521 | 92130751 | small proline-rich protein<br>2C                | Sprr2c       | N.D. | N.D. | N.D. | N.D.  | N.D. | N.D. | N.D. |
| 92143080 | 92144793 | small proline-rich protein<br>2D                | Sprr2d       | 1.12 | 1.07 | 1.41 | 5.44  | 1.13 | 1.19 | 0.99 |
| 92156065 | 92157371 | small proline-rich protein<br>2E                | Sprr2e       | 0.64 | 0.44 | 0.62 | 0.63  | 0.59 | 0.43 | 0.61 |
| 92169109 | 92170364 | small proline-rich protein<br>2F                | Sprr2f       | 1.23 | 1.82 | 1.17 | 2.78  | 1.29 | 2.21 | 1.32 |
| 92177837 | 92179151 | small proline-rich protein<br>2G                | Sprr2g       | 0.95 | 1.25 | 0.94 | 1.36  | 0.95 | 1.16 | 1.02 |
| 92189607 | 92191246 | small proline-rich protein<br>2H                | Sprr2h       | 0.74 | 1.04 | 1.54 | 21.68 | 0.71 | 0.95 | 0.87 |
| 92211913 | 92213193 | small proline-rich protein<br>2I                | Sprr2i       | N.D. | N.D. | N.D. | N.D.  | N.D. | N.D. | N.D. |
| 92222009 | 92223318 | small proline-rich protein<br>2J                | Sprr2j       | 0.64 | 0.79 | 0.62 | 0.78  | 0.60 | 0.64 | 0.61 |
| 92231960 | 92233348 | similar to Adhesion<br>regulating molecule 1    | LOC100043022 | N.D. | N.D. | N.D. | N.D.  | N.D. | N.D. | N.D. |
| 92236504 | 92237849 | small proline-rich protein<br>2K                | Sprr2k       | 0.54 | 0.70 | 0.63 | 0.76  | 0.40 | 0.32 | 0.53 |
| 92240731 | 92242701 | small proline-rich protein<br>1B                | Sprr1b       | 0.95 | 2.55 | 1.27 | 2.82  | 1.02 | 1.42 | 1.01 |
| 92260741 | 92261457 | small proline-rich protein<br>3                 | Sprr3        | 0.82 | 0.90 | 0.80 | 1.57  | 0.81 | 1.19 | 0.94 |
| 92277107 | 92277467 | similar to hCG1782414                           | LOC100042575 | N.D. | N.D. | N.D. | N.D.  | N.D. | N.D. | N.D. |
| 92287876 | 92289803 | small proline-rich protein<br>1A                | Sprr1a       | 0.53 | 1.13 | 0.71 | 2.84  | 0.66 | 0.56 | 0.76 |
| 92304185 | 92304415 | small proline-rich protein<br>4                 | Sprr4        | 1.06 | 1.81 | 0.88 | 2.81  | 1.03 | 1.77 | 1.14 |
| 92336432 | 92338490 | similar to CG4877-PA                            | LOC100042581 | N.D. | N.D. | N.D. | N.D.  | N.D. | N.D. | N.D. |
| 92374824 | 92377637 | Involucrin                                      | Ivl          | 1.08 | 2.48 | 1.77 | 27.33 | 1.03 | 2.45 | 1.47 |
| 92387788 | 92392946 | sperm mitochondria-<br>associated cysteine-rich | Smcp         | 1.34 | 2.44 | 0.91 | 3.44  | 1.11 | 2.23 | 1.55 |



|          |          |                                                   |               |      |       |       |        |      |      |      |
|----------|----------|---------------------------------------------------|---------------|------|-------|-------|--------|------|------|------|
| 92672281 | 92673296 | RIKEN cDNA<br>2310050C09 gene                     | 2310050C09Rik | 1.24 | 4.18  | 2.69  | 24.88  | 1.09 | 2.22 | 1.37 |
| 92729209 | 92730152 | late cornified envelope<br>3A                     | Lce3a         | N.D. | N.D.  | N.D.  | N.D.   | N.D. | N.D. | N.D. |
| 92736901 | 92738020 | late cornified envelope<br>3B                     | Lce3b         | N.D. | N.D.  | N.D.  | N.D.   | N.D. | N.D. | N.D. |
| 92748408 | 92749652 | late cornified envelope<br>3C                     | Lce3c         | 1.08 | 1.02  | 1.12  | 2.37   | 1.18 | 2.95 | 1.65 |
| 92761249 | 92762495 | similar to late cornified<br>envelope protein     | LOC630994     | N.D. | N.D.  | N.D.  | N.D.   | N.D. | N.D. | N.D. |
| 92770705 | 92772203 | RIKEN cDNA<br>2310001H18 gene                     | 2310001H18Rik | N.D. | N.D.  | N.D.  | N.D.   | N.D. | N.D. | N.D. |
| 92796148 | 92797348 | late cornified envelope 3F                        | Lce3f         | 1.23 | 1.97  | 0.89  | 2.97   | 1.03 | 0.95 | 1.30 |
| 92818129 | 92819608 | cysteine-rich C-terminal 1                        | Crcr1         | 1.36 | 11.23 | 13.65 | 195.88 | 1.38 | 2.19 | 1.11 |
| 92821729 | 92822982 | late cornified envelope<br>1M                     | Lce1m         | 2.19 | 7.04  | 3.57  | 26.77  | 1.24 | 3.16 | 1.69 |
| 92872745 | 92879427 | predicted gene,<br>EG229571                       | EG229571      | N.D. | N.D.  | N.D.  | N.D.   | N.D. | N.D. | N.D. |
| 92948709 | 92953393 | Cornulin                                          | Crnn          | N.D. | N.D.  | N.D.  | N.D.   | N.D. | N.D. | N.D. |
| 93001195 | 93025299 | filaggrin family member<br>2                      | Flg2          | N.D. | N.D.  | N.D.  | N.D.   | N.D. | N.D. | N.D. |
| 93081986 | 93083004 | predicted gene,<br>EG668300                       | EG668300      | N.D. | N.D.  | N.D.  | N.D.   | N.D. | N.D. | N.D. |
| 93086391 | 93097616 | Filaggrin                                         | Flg           | 0.92 | 0.56  | 41.84 | 137.00 | 0.88 | 2.23 | 1.03 |
| 93102884 | 93109394 | Hypothetical protein<br>LOC100042701              | LOC100042701  | N.D. | N.D.  | N.D.  | N.D.   | N.D. | N.D. | N.D. |
| 93124477 | 93137494 | Hornerin                                          | Hnrn          | 0.65 | 1.19  | 1.60  | 2.68   | 0.84 | 0.84 | 0.96 |
| 93197621 | 93203364 | Repetin                                           | Rptn          | N.D. | N.D.  | N.D.  | N.D.   | N.D. | N.D. | N.D. |
| 93237137 | 93237688 | predicted gene,<br>EG383891                       | EG383891      | N.D. | N.D.  | N.D.  | N.D.   | N.D. | N.D. | N.D. |
| 93246252 | 93252999 | Trichohyalin                                      | Tchh          | N.D. | N.D.  | N.D.  | N.D.   | N.D. | N.D. | N.D. |
| 93272676 | 93275902 | trichohyalin-like 1                               | Tchh1         | 3.57 | 13.58 | 4.46  | 10.41  | 3.05 | 9.96 | 3.85 |
| 93324418 | 93330210 | S100 calcium binding<br>protein A11 (calgizzarin) | S100a11       | 0.27 | 0.32  | 0.35  | 0.30   | 0.22 | 0.27 | 0.17 |



|          |          |                                              |         |      |      |      |      |      |      |      |
|----------|----------|----------------------------------------------|---------|------|------|------|------|------|------|------|
| 93359039 | 93368567 | S100 calcium binding protein A10 (calpactin) | S100a10 | 0.30 | 0.52 | 0.61 | 0.37 | 0.22 | 0.58 | 0.15 |
|----------|----------|----------------------------------------------|---------|------|------|------|------|------|------|------|

N.D. Not determined

**Table S2. Dynamics of expression of *Rps27* and *Gabpb2* genes during skin development**

**Dynamics of expression of *Rps27* and *Gabpb2* genes in developing epidermis**

| Gene name                         | Gene symbol | E11.5 epidermis fluorescent signal | E11.5 epidermis signal vs reference RNA signal | E14.5 epidermis fluorescent signal | E14.5 epidermis signal vs reference RNA signal | E16.5 epidermis fluorescent signal | E16.5 epidermis signal vs reference RNA signal | Adult epidermis fluorescent signal |
|-----------------------------------|-------------|------------------------------------|------------------------------------------------|------------------------------------|------------------------------------------------|------------------------------------|------------------------------------------------|------------------------------------|
| ribosomal protein S27             | Rps27       | 183427.9                           | 0.81                                           | 490939.00                          | 1.88                                           | 184131.60                          | 1.3                                            | 204156.10                          |
| GA repeat binding protein, beta 2 | Gabpb2      | 259                                | 1.25                                           | 462.22                             | 2.78                                           | 292.59                             | 0.52                                           | 669.10                             |

**Dynamics of expression of *Rps27* and *Gabpb2* genes in developing dermis**

| Gene name                         | Gene symbol | E11.5 dermis fluorescent signal | E11.5 dermis signal vs reference RNA signal | E16.5 dermis fluorescent signal | E16.5 dermis signal vs reference RNA signal | Adult dermis fluorescent signal | Adult dermis signal vs reference RNA signal |
|-----------------------------------|-------------|---------------------------------|---------------------------------------------|---------------------------------|---------------------------------------------|---------------------------------|---------------------------------------------|
| ribosomal protein S27             | Rps27       | 155916.4                        | 0.57                                        | 90937.4                         | 0.62                                        | 167709.20                       | 0.99                                        |
| GA repeat binding protein, beta 2 | Gabpb2      | 631.5                           | 1.67                                        | 659.0                           | 2.51                                        | 407.25                          | 1.55                                        |

**Table S3. 3D-FISH BAC probes generated to the distinct regions of mouse chromosome 3**

| Probe         | BAC name    | Featured Gene  | BAC start | BAC end  | gene start | gene end |
|---------------|-------------|----------------|-----------|----------|------------|----------|
| <b>Rps27</b>  | RP23-480F10 | <b>Rps27</b>   | 89997746  | 90169775 | 90016591   | 90017569 |
|               |             |                |           |          |            |          |
| <b>EDC</b>    | RP24-318N12 | <b>S100a6</b>  | 90284072  | 90451873 | 90416816   | 90418336 |
|               | RP24-61G19  | <b>Lor</b>     | 91716002  | 91899804 | 91884193   | 91887064 |
|               | RP24-248L10 | <b>Ivl</b>     | 92215201  | 92392463 | 91887064   | 92377637 |
|               | RP24-341I21 | <b>Lce3c</b>   | 92634255  | 92806759 | 92748408   | 92749652 |
|               | RP23-425P7  | <b>S100a10</b> | 93215624  | 93411886 | 93359039   | 93368567 |
|               |             |                |           |          |            |          |
| <b>Gabpb2</b> | RP24-363H12 | <b>Gabpb2</b>  | 94926338  | 95086569 | 94985688   | 95021864 |

**Table S4. Gene expression in the EDC locus in the Brg1(i)ep<sup>-/-</sup> epidermis in comparison to the control at E16.5**

| Gene start | Gene end | Gene name                                  | Gene symbol | Control vs Brg1(i)ep <sup>-/-</sup> | Brg1(i)ep <sup>-/-</sup> vs Control |
|------------|----------|--------------------------------------------|-------------|-------------------------------------|-------------------------------------|
| 90314956   | 90318252 | S100 calcium binding protein A1            | S100a1      | 5                                   | 0.2                                 |
| 90318682   | 90328503 | S100 calcium binding protein A13           | S100a13     | 0.55                                | 1.82                                |
| 90330792   | 90332755 | S100 calcium binding protein A14           | S100a14     | 1.63                                | 0.61                                |
| 90345145   | 90347073 | S100 calcium binding protein A16           | S100a16     | 2.68                                | 0.37                                |
| 90394169   | 90395430 | predicted gene, EG628324                   | EG628324    | N.D.                                | N.D.                                |
| 90404137   | 90406624 | S100 calcium binding protein A3            | S100a3      | 1.05                                | 0.95                                |
| 90407692   | 90409963 | S100 calcium binding protein A4            | S100a4      | 2.48                                | 0.4                                 |
| 90412444   | 90415702 | S100 calcium binding protein A5            | S100a5      | 0.76                                | 1.31                                |
| 90416816   | 90418336 | S100 calcium binding protein A6 (calcylin) | S100a6      | 1.13                                | 0.89                                |
| 90458224   | 90462052 | S100 calcium binding protein A7A           | S100a7a     | 0.07                                | 13.81                               |

|          |          |                                                                              |               |       |       |
|----------|----------|------------------------------------------------------------------------------|---------------|-------|-------|
| 90472993 | 90473956 | S100 calcium binding protein A8<br>(calgranulin A)                           | S100a8        | 0.07  | 13.81 |
| 90496555 | 90499613 | S100 calcium binding protein A9<br>(calgranulin B)                           | S100a9        | 0.02  | 55.18 |
| 90512767 | 90514887 | similar to 40S ribosomal protein S2                                          | LOC668165     | N.D.  | N.D.  |
| 90526554 | 90527441 | similar to Serine/threonine-protein<br>phosphatase alpha-3 isoform           | LOC383949     | N.D.  | N.D.  |
| 90530874 | 90544432 | Peptidoglycan recognition protein 4                                          | Pglyrp4       | 0.94  | 1.06  |
| 90562587 | 90565233 | apoptosis inhibitor 5 pseudogene                                             | LOC329706     | N.D.  | N.D.  |
| 90579741 | 90581802 | predicted gene, EG545541                                                     | EG545541      | N.D.  | N.D.  |
| 90682671 | 90692628 | similar to Calgranulin B (Migration<br>inhibitory factor-related protein 14) | LOC635737     | N.D.  | N.D.  |
| 90718795 | 90720856 | predicted gene, EG668174                                                     | EG668174      | N.D.  | N.D.  |
| 90813317 | 90821107 | similar to nischarin                                                         | LOC668179     | N.D.  | N.D.  |
| 90841248 | 90844152 | similar to 60S acidic ribosomal protein P1                                   | LOC635756     | N.D.  | N.D.  |
| 90875369 | 90880395 | RIKEN cDNA 4930529C04 gene                                                   | 4930529C04Rik | N.D.  | N.D.  |
| 90892059 | 90894727 | RIKEN cDNA 9130204L05 gene                                                   | 9130204L05Rik | N.D.  | N.D.  |
| 91542275 | 91544416 | similar to S100 calcium-binding protein;<br>S100RVP                          | LOC100042463  | N.D.  | N.D.  |
| 91818534 | 91835506 | Peptidoglycan recognition protein 3                                          | Pglyrp3       | 1.02  | 0.98  |
| 91828410 | 91828989 | predicted gene, EG619750                                                     | EG619750      | N.D.  | N.D.  |
| 91884193 | 91887064 | Loricrin                                                                     | Lor           | 61.63 | 0.02  |
| 91926126 | 91927869 | proline rich 9                                                               | Prr9          | 0.81  | 1.24  |
| 92019757 | 92026413 | small proline-rich protein 2A1                                               | Sprr2a1       | 1.06  | 0.95  |
| 92054569 | 92061226 | small proline-rich protein 2A2                                               | Sprr2a2       | 23.57 | 0.04  |
| 92120627 | 92122007 | small proline-rich protein 2B                                                | Sprr2b        | 1.09  | 0.92  |
| 92130521 | 92130751 | small proline-rich protein 2C                                                | Sprr2c        | N.D.  | N.D.  |
| 92143080 | 92144793 | small proline-rich protein 2D                                                | Sprr2d        | 0.13  | 7.73  |
| 92156065 | 92157371 | small proline-rich protein 2E                                                | Sprr2e        | 1.06  | 0.95  |

|          |          |                                                     |              |       |       |
|----------|----------|-----------------------------------------------------|--------------|-------|-------|
| 92169109 | 92170364 | small proline-rich protein 2F                       | Sprr2f       | 0.27  | 3.67  |
| 92177837 | 92179151 | small proline-rich protein 2G                       | Sprr2g       | 0.09  | 10.83 |
| 92189607 | 92191246 | small proline-rich protein 2H                       | Sprr2h       | 0.15  | 6.82  |
| 92211913 | 92213193 | small proline-rich protein 2I                       | Sprr2i       | 0.48  | 2.09  |
| 92222009 | 92223318 | small proline-rich protein 2J                       | Sprr2j       | 1.83  | 0.55  |
| 92231960 | 92233348 | similar to Adhesion regulating molecule 1           | LOC100043022 | N.D.  | N.D.  |
| 92236504 | 92237849 | small proline-rich protein 2K                       | Sprr2k       | 3.25  | 0.31  |
| 92240731 | 92242701 | small proline-rich protein 1B                       | Sprr1b       | 2.56  | 0.39  |
| 92260741 | 92261457 | small proline-rich protein 3                        | Sprr3        | 1.06  | 0.94  |
| 92277107 | 92277467 | similar to hCG1782414                               | LOC100042575 | N.D.  | N.D.  |
| 92287876 | 92289803 | small proline-rich protein 1A                       | Sprr1a       | 2.24  | 0.45  |
| 92304185 | 92304415 | small proline-rich protein 4                        | Sprr4        | 0.98  | 1.02  |
| 92336432 | 92338490 | similar to CG4877-PA                                | LOC100042581 | N.D.  | N.D.  |
| 92374824 | 92377637 | Involucrin                                          | Ivl          | 1.84  | 0.54  |
| 92387788 | 92392946 | sperm mitochondria-associated cysteine-rich protein | Smcp         | 1     | 1     |
| 92424007 | 92425582 | late cornified envelope 6A                          | Lce 6a       | N.D.  | N.D.  |
| 92450454 | 92452229 | late cornified envelope 1A1                         | Lce1a1       | 32.89 | 0.03  |
| 92459572 | 92460848 | late cornified envelope 1B                          | Lce1b        | 8.66  | 0.12  |
| 92468155 | 92468766 | similar to 60S ribosomal protein L13 (A52)          | LOC620325    | N.D.  | N.D.  |
| 92472535 | 92474237 | late cornified envelope 1A2                         | Lce1a2       | 32.59 | 0.03  |
| 92483169 | 92484840 | late cornified envelope 1C                          | Lce1c        | N.D.  | N.D.  |
| 92489421 | 92491132 | late cornified envelope 1D                          | Lce1d        | 10.44 | 0.1   |
| 92492476 | 92495109 | similar to 14-3-3 zeta                              | LOC100043062 | N.D.  | N.D.  |
| 92511322 | 92512996 | late cornified envelope 1E                          | Lce1e        | 4.09  | 0.24  |
| 92522607 | 92524272 | late cornified envelope 1F                          | Lce1f        | 3.1   | 0.32  |
| 92541767 | 92542251 | similar to small proline rich-like 9                | LOC668264    | N.D.  | N.D.  |
| 92554073 | 92556260 | late cornified envelope 1G                          | Lce1g        | 4.06  | 0.25  |
| 92567137 | 92568987 | late cornified envelope 1H                          | Lce1h        | 2.72  | 0.37  |

|          |          |                                                   |               |       |      |
|----------|----------|---------------------------------------------------|---------------|-------|------|
| 92581132 | 92582821 | late cornified envelope 1I                        | Lceli         | 19.42 | 0.05 |
| 92593074 | 92594529 | Hypothetical LOC545547                            | LOC545547     | N.D.  | N.D. |
| 92610213 | 92616300 | Hypothetical protein LOC631101                    | LOC631101     | N.D.  | N.D. |
| 92626996 | 92631169 | Keratinocyte expressed, proline-rich              | Kprp          | 7.13  | 0.14 |
| 92653871 | 92655208 | late cornified envelope 1L                        | Lce1l         | 8.76  | 0.11 |
| 92672281 | 92673296 | RIKEN cDNA 2310050C09 gene                        | 2310050C09Rik | 3.29  | 0.3  |
| 92729209 | 92730152 | late cornified envelope 3A                        | Lce3a         | 1.55  | 0.65 |
| 92736901 | 92738020 | late cornified envelope 3B                        | Lce3b         | 6.98  | 0.14 |
| 92748408 | 92749652 | late cornified envelope 3C                        | Lce3c         | 2.79  | 0.36 |
| 92761249 | 92762495 | similar to late cornified envelope protein        | LOC630994     | N.D.  | N.D. |
| 92770705 | 92772203 | RIKEN cDNA 2310001H18 gene                        | 2310001H18Rik | N.D.  | N.D. |
| 92796148 | 92797348 | late cornified envelope 3F                        | Lce3f         | 4.9   | 0.2  |
| 92818129 | 92819608 | cysteine-rich C-terminal 1                        | Cret1         | 3.21  | 0.31 |
| 92821729 | 92822982 | late cornified envelope 1M                        | Lce1m         | 16.23 | 0.06 |
| 92872745 | 92879427 | predicted gene, EG229571                          | EG229571      | 1.51  | 0.66 |
| 92948709 | 92953393 | Cornulin                                          | Crnn          | 0.98  | 1.02 |
| 93001195 | 93025299 | filaggrin family member 2                         | Flg2          | 1.6   | 0.63 |
| 93081986 | 93083004 | predicted gene, EG668300                          | EG668300      | N.D.  | N.D. |
| 93086391 | 93097616 | Filaggrin                                         | Flg           | N.D.  | N.D. |
| 93102884 | 93109394 | Hypothetical protein LOC100042701                 | LOC100042701  | N.D.  | N.D. |
| 93124477 | 93137494 | Hornerin                                          | Hrnr          | 2.24  | 0.45 |
| 93197621 | 93203364 | Repetin                                           | Rptn          | 1.03  | 0.97 |
| 93237137 | 93237688 | predicted gene, EG383891                          | EG383891      | N.D.  | N.D. |
| 93246252 | 93252999 | Trichohyalin                                      | Tchh          | 0.63  | 1.59 |
| 93272676 | 93275902 | trichohyalin-like 1                               | Tchhl1        | 1.09  | 0.91 |
| 93324418 | 93330210 | S100 calcium binding protein A11<br>(calgizzarin) | S100a11       | 1.6   | 0.62 |
| 93359039 | 93368567 | S100 calcium binding protein A10<br>(calpactin)   | S100a10       | 2.27  | 0.44 |

N.D. Not determined

**Table S5. Sites within the 5 Mb EDC containing region bound by Brg1**

| <b>Peak start</b> | <b>Peak finish</b> | <b>Peak start</b> | <b>Peak finish</b> | <b>Peak start</b> | <b>Peak finish</b> |
|-------------------|--------------------|-------------------|--------------------|-------------------|--------------------|
| 89009600          | 89011000           | 90362400          | 90364000           | 94195000          | 94198400           |
| 89053600          | 89058400           | 90365800          | 90369800           | 94286200          | 94287800           |
| 89071600          | 89077600           | 90388200          | 90394600           | 94389000          | 94392400           |
| 89078600          | 89087600           | 90401000          | 90402800           | 94411800          | 94418400           |
| 89088400          | 89090600           | 90406400          | 90408600           | 94432200          | 94434600           |
| 89100800          | 89110400           | 90412400          | 90415800           | 94452400          | 94455200           |
| 89134000          | 89140400           | 90433200          | 90434800           | 94460600          | 94464000           |
| 89191200          | 89201000           | 90528000          | 90530800           | 94468000          | 94470200           |
| 89202000          | 89204000           | 90773000          | 90774000           | 94480800          | 94488800           |
| 89218000          | 89224000           | 91837000          | 91840800           | 94560200          | 94563800           |
| 89260000          | 89261800           | 91908200          | 91909400           | 94586600          | 94595600           |
| 89271600          | 89275000           | 91973800          | 91975000           | 94601800          | 94603400           |
| 89285200          | 89287400           | 91990400          | 91991800           | 94614400          | 94616400           |

|          |          |          |          |          |          |
|----------|----------|----------|----------|----------|----------|
| 89302200 | 89306200 | 92049600 | 92050800 | 94623000 | 94625200 |
| 89318600 | 89324400 | 92084600 | 92085600 | 94734200 | 94737800 |
| 89451200 | 89453000 | 92289800 | 92290800 | 94748400 | 94750200 |
| 89602200 | 89603600 | 92383000 | 92383800 | 94800000 | 94801800 |
| 89616400 | 89617800 | 92412800 | 92414000 | 94831000 | 94836600 |
| 89633600 | 89636400 | 92698000 | 92700000 | 94928400 | 94939000 |
| 89663800 | 89665400 | 92814600 | 92818800 | 95003800 | 95005400 |
| 89668800 | 89671000 | 92829400 | 92831400 | 95040400 | 95045000 |
| 89671800 | 89673600 | 92927000 | 92928600 | 95066000 | 95068000 |
| 89698000 | 89704000 | 92931600 | 92934000 | 95083600 | 95091200 |
| 89709000 | 89711400 | 93084000 | 93097200 | 95092800 | 95100400 |
| 89713600 | 89718000 | 93098000 | 93102000 | 95110000 | 95113000 |
| 89718800 | 89722200 | 93159200 | 93161600 | 95113800 | 95125200 |
| 89868600 | 89870800 | 93169400 | 93170200 | 95207800 | 95211000 |
| 89891200 | 89893000 | 93171000 | 93172000 | 95321400 | 95323200 |
| 90045200 | 90049200 | 93323800 | 93327200 | 95448600 | 95450600 |
| 90207000 | 90208800 | 93415600 | 93417800 | 95453400 | 95456600 |

|          |          |          |          |          |          |
|----------|----------|----------|----------|----------|----------|
| 90215000 | 90217000 | 93563800 | 93566000 | 95466200 | 95471600 |
| 90279200 | 90281200 | 94115600 | 94119200 | 95478800 | 95481600 |
| 90292600 | 90302200 | 94132600 | 94135600 | 95494600 | 95500600 |
| 90340200 | 90344000 | 94147600 | 94149400 |          |          |

**Table S6. List of PCR primers used for quantitative RT-PCR**

| Gene        | Accession number | Forward/reverse primers                                |
|-------------|------------------|--------------------------------------------------------|
| Smarca/Brg1 | NM_009351        | F:CGTAAGCGTAAGCGAGAC<br>R:CATCTTCTTGGTGAGGTTAGG        |
| Flg2        | NM_001013804     | F:GGAACAGAAGGACAGGAG<br>R:TATGTATATAGCGGAGTATTGC       |
| Gabpb2      | NM_026493        | F:TTCCACTTAGTTTCTGACATCTTG<br>R:GTACATAAAGCTGCCAGACAAC |
| Ivl         | NM_008412        | F:GCAGGAGAAGTAGATAGAG<br>R:TTAAGGAAGTGTGGATGG          |
| Lce1a1      | NM_025984        | F:TTCACCAGCAGAGATGTC<br>R:CCAGACTACAGCAGGAAG           |
| Lce1a2      | NM_028625        | F:TTCACCAGCAGAGATGTC<br>R:TACAGCAGGAAGACACAG           |
| Lce3        | NM_033175        | F:CCAGTTCCTGCCGAGATG<br>R:ACTTTGGAGAGGGACACTTG         |
| Lor         | NM_175656        | F:TTCCAAACCCTTCACATTTTAAG<br>R:GGGAGGTAGTCATTCAGAAAC   |
| Rps27       | NM_033596        | F:CTGCTCCACTGTCCTCTG<br>R:GGTTCCCACTCATCTTCAATC        |



**Table S7. List of PCR primers used for quantitative PCR after Chromatin Immuno-Precipitation**

| <b>Genomic Region</b> | <b>Forwar/reverse primers</b>                           |
|-----------------------|---------------------------------------------------------|
| Brg1 893/1050         | F: GCCCTTCCCAGTTTTTAAGATAG<br>R:ACTCAAAGGCTGTCTGTCAGTTC |
| Brg1 1181/1440        | F: GCAAATCGTTCCTACATCATCA<br>R:AAGGAGAAACGTCCCCATATTT   |
| Cld1 promoter         | F: TGGAAGCATCCCTTGTTTTTC<br>R:TTGCTGTCCTCTCTGGGTCT      |

**Table S8. List of primary antibodies**

| <b>Antigen</b> | <b>Host</b> | <b>Dilution</b> | <b>Manufacturer</b>                           |
|----------------|-------------|-----------------|-----------------------------------------------|
| p63a           | Rabbit      | 1:200           | Santa Cruz Biotechnology, Santa Cruz, CA, USA |
| Satb1          | Rabbit      | 1:100           | Cell Signaling, Denvers, MA, USA              |
| Loricrin       | Rabbit      | 1:1000          | Covance, Emeryville, CA                       |
| Ki-67          | Rabbit      | 1:200           | Abcam, Cambridge, UK                          |
| SC-35          | Mouse       | 1:20            | Sigma, St Louis, MO                           |
| Smarca4/Brg1   | Rabbit      | 1:200           | Santa Cruz Biotechnology, Santa Cruz, CA, USA |
